# Supplementary material for: Enablers and barriers to effective diabetes self-management: A multi-national investigation
Source: PubMed Central journal article supplement (PMC6550406; doi:10.1371/journal.pone.0217771), 2019-06-05
Supplement: pone.0217771.s001.pdf [file pone.0217771.s001.pdf]

**Additional File 2. Consolidated criteria for reporting qualitative studies (COREQ): 32-item checklist**

| No. Item                                       | Guide questions/description                                                                                                                | Where in manuscript                                                                                                                                                |
|------------------------------------------------|--------------------------------------------------------------------------------------------------------------------------------------------|--------------------------------------------------------------------------------------------------------------------------------------------------------------------|
| <b>Domain 1: Research team and reflexivity</b> |                                                                                                                                            |                                                                                                                                                                    |
| <i>Personal Characteristics</i>                |                                                                                                                                            |                                                                                                                                                                    |
| 1. Interviewer/facilitator                     | Which author/s conducted the interview or focus group?                                                                                     | Methods                                                                                                                                                            |
| 2. Credentials                                 | What were the researcher's credentials? E.g. PhD, MD                                                                                       | Interviewer: <i>MPharm. MDA: BSc, Msc, Grad Cert Diab Edu; UHM: MBBS, Msc, MD; AEOMA: BSc, Msc, PhD; BMA: BSc, Msc, Grad Cert ULT, Grad Cert Mgt, PhD</i>          |
| 3. Occupation                                  | What was their occupation at the time of the study?                                                                                        | Please find at the end of this list                                                                                                                                |
| 4. Gender                                      | Was the researcher male or female?                                                                                                         | Methods                                                                                                                                                            |
| 5. Experience and training                     | What experience or training did the researcher have?                                                                                       | Methods                                                                                                                                                            |
| <b><i>Relationship with participants</i></b>   |                                                                                                                                            |                                                                                                                                                                    |
| 6. Relationship established                    | Was a relationship established prior to study commencement?                                                                                | Methods                                                                                                                                                            |
| 7. Participant knowledge of the interviewer    | What did the participants know about the researcher? E.g., personal goals, reasons for doing the research                                  | Methods                                                                                                                                                            |
| 8. Interviewer characteristics                 | What characteristics were reported about the interviewer/facilitator? E.g., Bias, assumptions, reasons and interests in the research topic | The interviewer was only involved in the data collection. He specifically assisted in conducting the interviews and did not participate in other study procedures. |
| <b>Domain 2: study design</b>                  |                                                                                                                                            |                                                                                                                                                                    |
| <i>Theoretical framework</i>                   |                                                                                                                                            |                                                                                                                                                                    |
| 9. Methodological                              | What methodological orientation was                                                                                                        | Methods                                                                                                                                                            |

|                                        |                                                                                                                      |                      |
|----------------------------------------|----------------------------------------------------------------------------------------------------------------------|----------------------|
| orientation and Theory                 | stated to underpin the study? e.g. grounded theory, discourse analysis, ethnography, phenomenology, content analysis |                      |
| <i>Participant selection</i>           |                                                                                                                      |                      |
| 10. Sampling                           | How were participants selected? e.g. purposive, convenience, consecutive, snowball                                   | Methods              |
| 11. Method of approach                 | How were participants approached? e.g. face-to-face, telephone, mail, email                                          | Methods              |
| 12. Sample size                        | How many participants were in the study?                                                                             | Results              |
| 13. Non-participation                  | How many people refused to participate or dropped out? Reasons?                                                      | Results              |
| <i>Setting</i>                         |                                                                                                                      |                      |
| 14. Setting of data collection         | Where was the data collected? e.g. home, clinic, workplace                                                           | Methods              |
| 15. Presence of non-participants       | Was anyone else present besides the participants and researchers?                                                    | Methods              |
| 16. Description of sample              | What are the important characteristics of the sample? e.g. demographic data, date                                    | Results              |
| <i>Data collection</i>                 |                                                                                                                      |                      |
| 17. Interview guide                    | Were questions, prompts, guides provided by the authors? Was it pilot tested?                                        | Methods, S1 Appendix |
| 18. Repeat interviews                  | Were repeat interviews carried out? If yes, how many?                                                                | Methods              |
| 19. Audio/visual recording             | Did the research use audio or visual recording to collect the data?                                                  | Methods              |
| 20. Field notes                        | Were field notes made during and/or after the interview or focus group?                                              | None                 |
| 21. Duration                           | What was the duration of the interviews or focus group?                                                              | Methods              |
| 22. Data saturation                    | Was data saturation discussed?                                                                                       | Methods              |
| 23. Transcripts returned               | Were transcripts returned to participants for comment and/or correction?                                             | Methods              |
| <b>Domain 3: analysis and findings</b> |                                                                                                                      |                      |
| <i>Data analysis</i>                   |                                                                                                                      |                      |
| 24. Number of data                     | How many data coders coded the                                                                                       | Methods              |

|                                    |                                                                                                                                 |         |
|------------------------------------|---------------------------------------------------------------------------------------------------------------------------------|---------|
| coders                             | data?                                                                                                                           |         |
| 25. Description of the coding tree | Did authors provide a description of the coding tree?                                                                           | Methods |
| 26. Derivation of themes           | Were themes identified in advance or derived from the data?                                                                     | Methods |
| 27. Software                       | What software, if applicable, was used to manage the data?                                                                      | Methods |
| 28. Participant checking           | Did participants provide feedback on the findings?                                                                              | Methods |
| <i>Reporting</i>                   |                                                                                                                                 |         |
| 29. Quotations presented           | Were participant quotations presented to illustrate the themes/findings? Was each quotation identified? e.g. participant number | Results |
| 30. Data and findings consistent   | Was there consistency between the data presented and the findings?                                                              | Yes.    |
| 31. Clarity of major themes        | Were major themes clearly presented in the findings?                                                                            | Yes     |
| 32. Clarity of minor themes        | Is there a description of diverse cases or discussion of minor themes?                                                          | Yes     |

**Occupation of interviewer and researchers at the time of the study:**

- Interviewer: Lecturer and PhD Candidate, College of Medicine and Dentistry, James Cook University.
- Mary D Adu: PhD Candidate, College of Medicine and Dentistry, James Cook University.
- Usman H Malabu: Consultant Endocrinologist and Professor of Medicine, Townsville Hospital and Health Services / College of Medicine and Dentistry, James Cook University.
- Aduli EO Malau-Aduli: Associate Professor, College of Public Health, Medical and Veterinary Sciences, James Cook University.
- Bunmi S Malau-Aduli: Associate Professor, College of Medicine and Dentistry, James Cook University.

**Reference:** Tong A, Sainsbury P, Craig J. Consolidated criteria for reporting qualitative research (COREQ): a 32-item checklist for interviews and focus groups. *International Journal for Quality in Health Care*. 2007. Volume 19, Number 6: pp. 349 – 357
